# Supplementary material
Source: PubMed Central journal article supplement (PMC3137131)
Supplement: NIHMS307856-supplement-supplementary_data.pdf [file NIHMS307856-supplement-supplementary_data.pdf]

### ***Supplemental Materials and Methods***

**Animals:** All animal investigations were performed in compliance with Northwestern University's institutional guidelines and under the National Research Council's criteria for humane care as outlined in the "Guide for the Care and Use of Laboratory Animals". Female New Zealand White rabbits (3-4kg) were purchased from Covance (Princeton, NJ) and were acclimated for a minimum of 7 days prior to enrollment in experiments. Anesthesia included intramuscular ketamine (45mg/kg) and xylazine (7mg/kg), or inhaled isoflurane (1-2%), as well as a local anesthetic (1% lidocaine HCl and 1:100,000 epinephrine). Post-operative analgesia was achieved by the administration of 0.05mg/kg buprenorphine every 6-12 hours for up to 3 days following surgery.

**Skin and mucosal incisional grid model:** The ventral surface of each ear and the vaginal introitus, perineum, and surrounding area was depilated and a surgical scrub was performed (N=8 per time point). On each ear, a 2cm x 2cm grid of shallow (30-50 $\mu$ m deep) perpendicular incisions was made with a maximum distance of 1mm between incisions. These wounds were covered with a semi-occlusive Tegaderm dressing (3M, St Paul, MN) until complete re-epithelialization occurred. In the vagina of the same animals, a series of shallow (30-50 $\mu$ m deep), parallel, longitudinal incisions was made from the introitus into the vagina (length = 3cm). The incisions were made around the entire circumference of the vagina, with a maximum distance of 1mm between incisions. At defined intervals (12 hours, 24 hours, 3 days, 5 days) after injury, the animals were euthanized and samples of the cutaneous and mucosal wounds and uninjured tissue were taken. Each animal was used for one time point only.

**Hypertrophic scar model:** A reproducible model of cutaneous hypertrophic scar formation in the New Zealand White rabbit was utilized as previously described (Kloeters et al. 2008). Briefly, the ventral surface of each ear was depilated and a surgical scrub was performed. At each of six sites per ear, a 7mm diameter biopsy punch was used to score the skin to the depth of the cartilage, and the epidermis and dermis was removed, leaving the perichondrium intact. All wounds were dressed with Tegaderm dressing (3M, St Paul, MN), and the dressings were replaced as necessary until complete re-epithelialization was observed on post-operative day 18. On post-operative days 20, 25, and 30, 7.5mg (50 $\mu$ L) of the interleukin-1 receptor antagonist Anakinra (Kineret TM) (Amgen, Thousand Oaks, CA), or vehicle control was injected subcutaneously at the site of each wound site (N=4 animals, 24-48 wounds per treatment). The dose of IL-1RA utilized was equivalent to the human daily therapeutic dose of 1-2mg/kg, but the treatment was administered at a reduced frequency due to the need to anesthetize the animals for each therapeutic treatment. All animals were euthanized at 35 days post-surgery and samples of wounded and control tissue were taken.

**Histology:** Following euthanasia, full thickness samples of all wounds and from normal skin and mucosa were taken and fixed overnight in 10% zinc formalin for histological analysis. All samples were embedded in paraffin (Paraplast X-tra, Fisher Scientific, Houston, TX) and were sectioned at 5 $\mu$ m thickness through the center of each wound. Sections were de-paraffinized and stained with hematoxylin and eosin, and were photographed under 10x or 20x magnification. The epithelial thickness (number of cells and absolute thickness in  $\mu$ m) was determined for all incisional wounds. The total scar

area (scar elevation index, SEI) (Kloeters et al. 2008) of all full thickness punch wounds was determined using ImageJ software (NIH, Bethesda, MD). A SEI value of 1 indicates that the scar dermis is of an equivalent height to the dermis of the adjacent normal, unwounded skin. A SEI value of 2 indicates that the height of the scar dermis is twice that of unwounded skin.

**RNA extraction:** Following euthanasia, samples of all wounds were frozen in RNAlater (Ambion, Austin, TX) at -80°C for molecular analysis. The epithelium of all incisional grid samples was mechanically separated from the underlying mesenchymal tissue using a single-edged razor blade (Schierle et al. 2007). The cutaneous dermis was further separated from the underlying cartilage, and the cartilage was discarded. All full thickness punch wounds were separated from the underlying cartilage and were processed intact (epidermis and dermis together). Each tissue compartment (epithelium, connective tissue, or whole skin) was homogenized independently in RLT buffer (Qiagen, Valencia, CA) with 1% beta-mercaptoethanol using a PowerGen Model 500 Homogenizer (Fisher Scientific, Houston, TX). Total RNA was extracted and purified using the RNeasy kit (Qiagen, Valencia, CA) as previously described (Reno et al. 1997). RNA quality was determined using the Agilent Bioanalyzer (Agilent Technologies, Santa Clara, CA)

**Microarray:** A subset of paired rabbit skin and mucosal epithelial RNA samples (N=5-6 per time point) plus four common control (pooled) samples were chosen for microarray analysis based on the histologic analysis of each sample and on the RNA quality (A260/A280 ratio, 28s/18s RNA ratio, RNA integrity number). All 60 samples were labeled with the One-Color Quick-Amp Labeling Kit (Agilent Technologies, Santa Clara, CA) and then were hybridized to an Agilent custom rabbit microarray containing 4 sets of 44,000 probes per slide (23679 unique probes, Amadid #017132) (Agilent Technologies, Santa Clara, CA). All labeling and hybridization was performed at the University of Florida Interdisciplinary Center for Biotechnology Research according to standard Agilent recommended protocols.

Data preprocessing was performed using the Bioconductor Agi4x44PreProcess package. The Agilent Feature Extraction (AFE) algorithm was used for image analysis and background correction. Quantile normalization was then used to correct for the non-biological variations across arrays. Probes were filtered based on the criteria that at least 5 of the 60 samples must have a signal level above background and negative controls. Duplicated probes were combined using their median intensities. As the gene expression level of unwounded skin and mucosal epithelium were quite different, in order to detect gene expression changes over time in response to injury, the data were normalized against the unwounded tissue by subtracting the respective tissue T=0 sample mean (in log<sub>2</sub> scale) from each value. To identify differentially expressed genes, we applied routines implemented in the Bioconductor Limma package to fit linear models to the normalized expression values (Smyth 2005). The variance used in the t-score calculation was corrected by an empirical Bayesian method for better estimation under small sample size.

To control for the effects of multiple testing and to minimize false positives, a subset of statistically significant transcripts was selected for further analysis based on the following filtering criteria: 1) absolute fold change >2, 2) p value <0.01, and 3) Benjamini &

Hochberg FDR <0.05. The data were analyzed to identify 1) temporal changes in gene expression over time in each tissue, and 2) genes whose expression differed between the two tissues. The latter utilized an F test, which identified a total of 1075 genes which had a significantly different fold change (normalized to unwounded tissue) between skin and mucosa at at least one time point. The gene profiles were then scaled to a standard deviation of 1 without shifting the mean of the profile, thereby keeping the direction of the fold-change unchanged. Next, hierarchical clustering was applied to get an overview of the cluster distribution. A cutoff threshold was visually selected to define initial clusters. Based on these initial clusters, K-Means clustering was performed. Five clusters of genes with different temporal expression patterns were identified. Functional analysis was performed on the genes which were differentially expressed over time in each tissue and on the genes that were located in the five clusters. First, the outlier genes which are were located far away from the cluster centers were filtered out. Then the over-represented functionalities of the genes were identified by using the Hypergeometric test based on the Gene Ontology database (Ashburner et al. 2000).

Raw and processed microarray data can be accessed at the Gene Expression Omnibus accession number (<http://www.ncbi.nlm.nih.gov/geo/> , GSE25261).

**Quantitative RT-PCR:** Reverse transcription was performed using one microgram of total RNA and M-MLV Reverse Transcriptase (Promega, Madison, WI) as per the manufacturer's instructions. Quantitative real-time PCR was performed on an ABI Prism 7000 Sequence Detection System (Applied Biosystems, Foster City, CA). Each PCR reaction was run in triplicate and contained 0.03 µg cDNA template along with 900nM primers and 250nM probe and Taq Man Universal Master Mix (Applied Biosystems, Foster City, CA) in a final reaction volume of 25 µL. Cycling parameters were: 50°C for 2 minutes, 95°C for 10 minutes to activate DNA polymerase, and then 40 cycles of 95°C for 15 seconds and 60°C for 1 minute. No-template controls were run in parallel to evaluate for amplification of genomic DNA. After thermal cycling, the relative mRNA expression of each amplicon was calculated by normalizing its Ct value relative to a housekeeping molecule (18s) and then expressing the value as a proportion of baseline levels (unwounded skin)( $2^{-\Delta\Delta Ct}$ ). All parameters were assessed using a one-sided ANOVA or using a paired t-test, with a p value of <0.05 indicating significance.

#### References:

Ashburner, M., Ball, C. A., Blake, J. A., Botstein, D., Butler, H., Cherry, J. M., Davis, A. P., Dolinski, K., Dwight, S. S., Eppig, J. T., Harris, M. A., Hill, D. P., Issel-Tarver, L., Kasarskis, A., Lewis, S., Matese, J. C., Richardson, J. E., Ringwald, M., Rubin, G. M. & Sherlock, G. (2000) *Nat Genet* 25, 25-9.

Kloeters O, Schierle C, Tandara A, Mustoe TA (2008). The use of a semioclusive dressing reduces epidermal inflammatory cytokine expression and mitigates dermal proliferation and inflammation in a rat incisional model. *Wound Repair Regen* 16: 568–75.

Reno C, Marchuk L, Sciore P, Frank CB, Hart DA (1997). Rapid isolation of total RNA from small samples of hypocellular, dense connective tissues. *Biotechniques* 22:1082-6.

Schierle C, O'Shaughnessy K, Ding XZ, Galiano RD, Mustoe TA (2007). Silicone gel occlusion suppresses epidermal activation in a murine cutaneous wound model. *Wound Repair Regen* 15: A23.

Smyth, G. (2005) *Statistical Applications in Genetics and Molecular Biology* **3**, Article 3.

## Supplemental Figure 1: Microarray analysis of injured epithelium: Major differences in gene expression between wounded skin and mucosa

Microarray analysis of cutaneous and mucosal epithelium at various times post-wounding (unwounded, 12 hours, 1 day, 3 days, 5 days, N=5) indicates that there are significant differences in how the two tissues respond to injury. Principal component analysis of 14647 probes that met the preprocessing criteria (A) indicates that the two biggest sources of variability in the data are tissue type (principal component 1), and time post-injury (principal component 2). A heatmap of the top 50 probes in the first principal component (B) indicates that gene expression in the skin and mucosal epithelium is significantly different prior to injury, and that many of those differences persist over time. A heatmap of the top 50 probes in the second principal component (C) indicates that injury results in a change of expression of a number of molecules involved in epithelial proliferation and differentiation, inflammation, and extracellular matrix synthesis and reorganization. Furthermore, it is evident that the cutaneous epithelium responds more strongly to injury, and that injury-associated gene expression changes persist for a longer period of time in the skin.

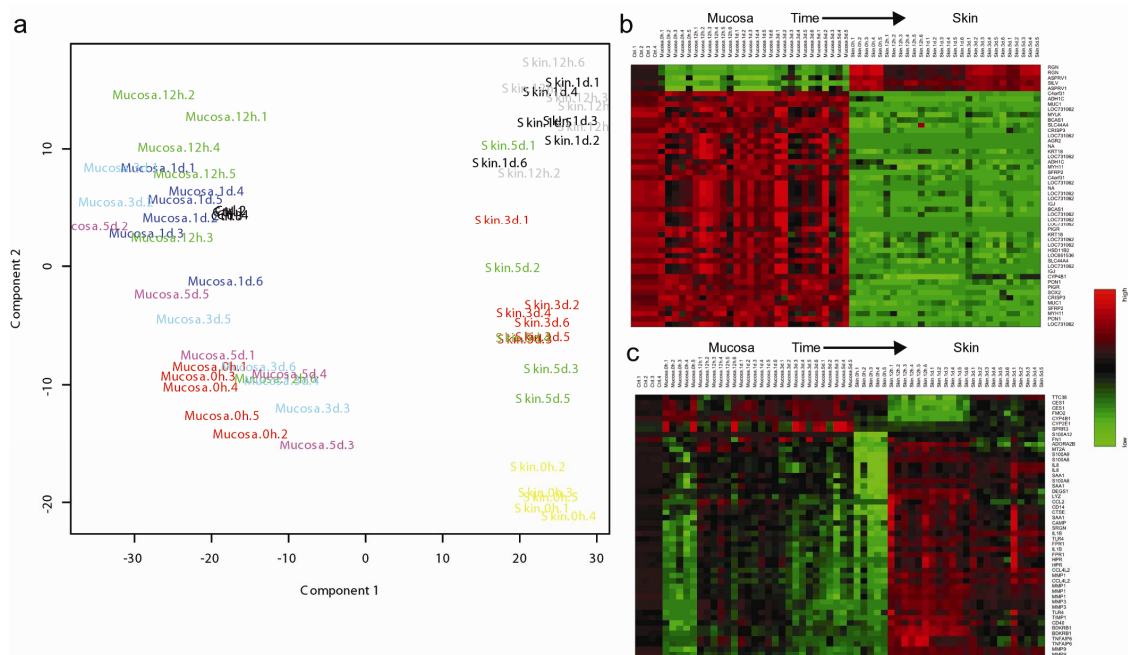

## Supplemental Figure 2: Functional analysis: Inflammation, response to stress, and anabolic processes (structure development) pathways are differentially upregulated in skin and mucosal epithelium following injury

Functional analysis of the genes which are differentially expressed over time in each tissue (A) and which are identified in each cluster (B) was performed using the Gene Ontology database. Gene functionalities, which are significantly overexpressed in healing skin as compared to mucosa, include response to wounding, response to stress, inflammation, structure development. These functionalities are more highly enriched in the skin samples, and are overexpressed for a longer following injury. All numbers in red indicate the top 10 GO categories for each sample group. The intensity of the background color corresponds to the p-value of enrichment tests.

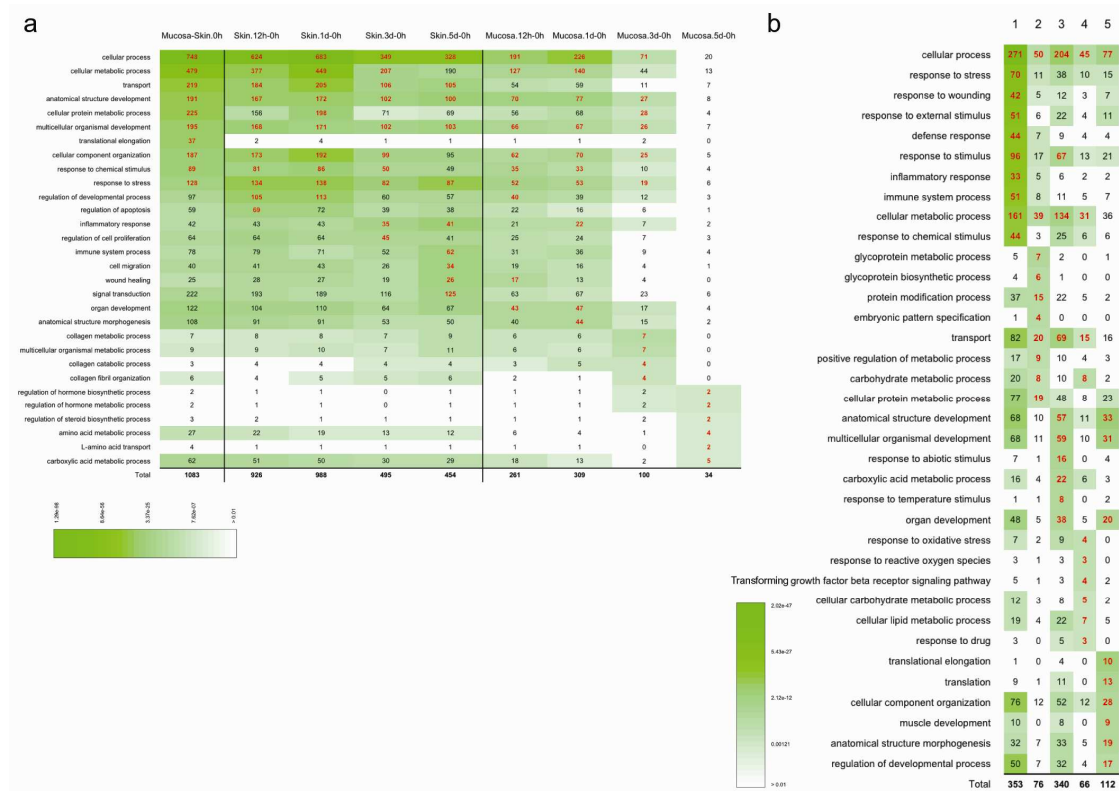

### Supplemental Figure 3: Alignment of Human and Rabbit IL-1RA sequences

In order to determine if a human interleukin-1 receptor antagonist would maintain its biological function if used in a rabbit, a multiple sequence alignment was performed between the human and rabbit IL-1RA sequence. Based on the work of Schreuder (Schreuder, Tardif et al. 1997), it is clear that all but one of the 17 amino acids that are responsible for IL-1RA binding to the IL-1 receptor are identical between human and rabbit.

```

Human  AAB41943  1  MEICRGLRSH  LITLLLFLFH  SETICRPSGR  KSSKMQAFRI  WDVNOKTFYL  50
Rabbit BAA04860  MRPSRSTRRH  LISLLLFLFH  SETACRPSGK  RPCRMQAFRI  WDVNOKTFYL
Consensus  MricRglRrH  LIIsLLLFLFH  SETaCRPSGr  rpcrMQAFRI  WDVNOKTFYL

Human  AAB41943  51  RNNQLVAGYL  QGNVNLEEK  IDVVPIEPA  LFLGIHGGKM  CLSCVKSGDE  100
Rabbit BAA04860  RNNQLVAGYL  QGNNAKLEER  IDVVPLEPQL  LFLGIQRGKL  CLSCVKSGDK
Consensus  RNNQLVAGYL  QGNanLEEr  IDVVPIEpa  LFLGIqrGK$  CLSCVKSGDe

Human  AAB41943  101  TRLQLEAVNI  TDLSENKQD  KRFAFIRSDS  GPTTSFESAA  CPGWFLCTAM  150
Rabbit BAA04860  MKLHLEAVNI  TDLGKNKEQD  KRFTFIRSNS  GPTTTFESAS  CPGWFLCTAL
Consensus  mrLqLEAVNI  TDLgeNreQD  KRFAFIRS#S  GPTTsFESaA  CPGWFLCTA$

Human  AAB41943  151  EADQPVSLTN  MPDEGVMVTK  FYFQEDE  177
Rabbit BAA04860  EADQPVSLTN  TPDDSIVVTK  FYFQEDQ
Consensus  EADQPVSLTN  mPD#g!mVTK  FYFQED#
```

#### Interactions with IL-1 receptor

##### Mismatch

Consensus symbols:

- ! is anyone of IV
- \$ is anyone of LM
- % is anyone of FY
- # is anyone of NDQEBZ

**Supplemental Table 1: Genes identified in each cluster**

| Cluster 1                                                               | Cluster 2                                                                | Cluster 3                                                 | Cluster 4                                                                        | Cluster 5                                                 |
|-------------------------------------------------------------------------|--------------------------------------------------------------------------|-----------------------------------------------------------|----------------------------------------------------------------------------------|-----------------------------------------------------------|
| 2',3'-cyclic nucleotide 3' phosphodiesterase                            | acyl-CoA synthetase long-chain family member 1                           | 3-hydroxyisobutyryl-Coenzyme A hydrolase                  | ADAM metallopeptidase domain 9 (meltrin gamma)                                   | A kinase (PRKA) anchor protein 12                         |
| 2'-5'-oligoadenylate synthetase-like                                    | ankyrin 3, node of Ranvier (ankyrin G)                                   | 3-oxoacid CoA transferase 1                               | adaptor-related protein complex 3, beta 2 subunit                                | acid phosphatase 6, lysophosphatidic                      |
| 3-hydroxy-3-methylglutaryl-Coenzyme A reductase                         | ATPase, Na <sup>+</sup> /K <sup>+</sup> transporting, beta 1 polypeptide | 5'-nucleotidase domain containing 2                       | adipose differentiation-related protein                                          | ADAM metallopeptidase with thrombospondin type 1 motif, 9 |
| acetoacetyl-CoA synthetase                                              | beta-site APP-cleaving enzyme 2                                          | abhydrolase domain containing 8                           | aldehyde dehydrogenase 1 family, member A1                                       | ADP-ribosylation factor-like 3                            |
| actin related protein 2/3 complex, subunit 4, 20kDa                     | BMI1 polycomb ring finger oncogene                                       | aconitase 2, mitochondrial                                | aldo-keto reductase family 1, member D1 (delta 4-3-ketosteroid-5-beta-reductase) | angiogenin, ribonuclease, RNase A family, 5               |
| actinin, alpha 3                                                        | bone morphogenetic protein 6                                             | actin binding LIM protein family, member 3                | alpha 1,3-galactosyltransferase 2                                                | annexin A5                                                |
| actinin, alpha 4                                                        | calpain 5                                                                | acyl-CoA synthetase family member 2                       | ankyrin repeat domain 13A                                                        | annexin A6                                                |
| activating transcription factor 4 (tax-responsive enhancer element B67) | catenin (cadherin-associated protein), beta 1, 88kDa                     | acyl-Coenzyme A dehydrogenase, C-4 to C-12 straight chain | anti-Mullerian hormone receptor, type II                                         | annexin A8                                                |
| acyl-CoA synthetase long-chain family member 3                          | cell division cycle and apoptosis regulator 1                            | acyl-Coenzyme A dehydrogenase, long chain                 | arginyl aminopeptidase (aminopeptidase B)                                        | apoptosis, caspase activation inhibitor                   |
| acyloxyacyl hydrolase (neutrophil)                                      | chloride channel 3                                                       | adenosylmethionine decarboxylase 1                        | aspartate beta-hydroxylase domain containing 1                                   | ATP-binding cassette, sub-family C (CFTR/MRP), member 9   |
| adaptor-related protein complex 1, gamma 1 subunit                      | chromosome 1 open reading frame 63                                       | adenylate cyclase 10 (soluble)                            | bleomycin hydrolase                                                              | bone morphogenetic protein 4                              |
| adenosine A2b receptor                                                  | chromosome 16 open reading frame 13                                      | alanyl (membrane) aminopeptidase                          | BTB (POZ) domain containing 3                                                    | caldesmon 1                                               |
| adenosine monophosphate deaminase (isoform E)                           | chromosome 4 open reading frame 49                                       | alcohol dehydrogenase 1C (class I), gamma polypeptide     | calcium channel, voltage-dependent, P/Q type, alpha 1A subunit                   | caprin family member 2                                    |



|                                                                                                   |                                                       |                                                                          |                                                         |                                                        |
|---------------------------------------------------------------------------------------------------|-------------------------------------------------------|--------------------------------------------------------------------------|---------------------------------------------------------|--------------------------------------------------------|
| adenosylmethionine decarboxylase 1                                                                | claudin 5                                             | aldehyde dehydrogenase 9 family, member A1                               | chromosome 10 open reading frame 58                     | carnitine palmitoyltransferase 1C                      |
| ADP-ribosyltransferase 1                                                                          | collagen, type VIII, alpha 2                          | aldolase C, fructose-bisphosphate                                        | chromosome 4 open reading frame 3                       | caveolin 1, caveolae protein, 22kDa                    |
| amidohydrolase domain containing 2                                                                | complement component 3                                | amylo-1, 6-glucosidase, 4-alpha-glucanotransferase                       | DNA-damage-inducible transcript 3                       | centromere protein N                                   |
| ankyrin repeat domain 22                                                                          | cysteine-rich secretory protein 3                     | androgen receptor                                                        | enolase 3 (beta, muscle)                                | ceruloplasmin (ferroxidase)                            |
| annexin A1                                                                                        | cytochrome P450, family 3, subfamily A, polypeptide 4 | angiomin like 2                                                          | G protein-coupled receptor 1                            | coagulation factor III (thromboplastin, tissue factor) |
| annexin A11                                                                                       | dual specificity phosphatase 4                        | ankylosis, progressive homolog (mouse)                                   | galactosidase, beta 1                                   | coiled-coil domain containing 80                       |
| annexin A3                                                                                        | E74-like factor 1 (ets domain transcription factor)   | apolipoprotein A-I binding protein                                       | glutathione S-transferase mu 3 (brain)                  | collagen, type V, alpha 1                              |
| apolipoprotein B mRNA editing enzyme, catalytic polypeptide 1                                     | family with sequence similarity 20, member C          | apolipoprotein E                                                         | glutathione synthetase                                  | collagen, type V, alpha 2                              |
| archain 1                                                                                         | F-box protein 34                                      | aquaporin 5                                                              | glycogenin 1                                            | collagen, type VI, alpha 1                             |
| ArfGAP with coiled-coil, ankyrin repeat and PH domains 2                                          | fibronectin type III domain containing 3B             | arginine vasopressin-induced 1                                           | G-protein signaling modulator 2 (AGS3-like, C. elegans) | collagen, type VI, alpha 2                             |
| arginase, liver                                                                                   | flavin containing monooxygenase 3                     | ATP synthase 6; ATPase subunit 6                                         | hexamethylene bis-acetamide inducible 1                 | collagen, type XII, alpha 1                            |
| arginine vasopressin-induced 1                                                                    | flavin containing monooxygenase 5                     | ATPase, aminophospholipid transporter (APLT), class I, type 8A, member 1 | high-mobility group box 2                               | complement component 4A (Rodgers blood group)          |
| ARP3 actin-related protein 3 homolog (yeast)                                                      | fructose-1,6-bisphosphatase 1                         | baculoviral IAP repeat-containing 7                                      | kinesin family member 20B                               | CUG triplet repeat, RNA binding protein 2              |
| asparagine-linked glycosylation 2, alpha-1,3-mannosyltransferase homolog ( <i>S. cerevisiae</i> ) | furin (paired basic amino acid cleaving enzyme)       | Bardet-Biedl syndrome 9                                                  | lactalbumin, alpha-                                     | cysteine and glycine-rich protein 2                    |
| aspartate beta-hydroxylase                                                                        | glucose-fructose                                      | basal cell adhesion                                                      | LIM and SH3 protein 1                                   | deoxyuridine                                           |

|                                                                           |                                                                |                                                             |                                                                          |                                                                           |
|---------------------------------------------------------------------------|----------------------------------------------------------------|-------------------------------------------------------------|--------------------------------------------------------------------------|---------------------------------------------------------------------------|
| domain containing 1                                                       | oxidoreductase domain containing 2                             | molecule (Lutheran blood group)                             |                                                                          | triphosphatase                                                            |
| ataxia telangiectasia and Rad3 related                                    | glutamate-cysteine ligase, catalytic subunit                   | basic transcription factor 3                                | lipocalin 2                                                              | desmin                                                                    |
| ATP synthase 6; ATPase subunit 6                                          | glutathione peroxidase 3 (plasma)                              | BH3 interacting domain death agonist                        | macrophage migration inhibitory factor (glycosylation-inhibiting factor) | dickkopf homolog 1 (Xenopus laevis)                                       |
| ATPase, Ca <sup>++</sup> transporting, cardiac muscle, slow twitch 2      | golgi phosphoprotein 3 (coat-protein)                          | biliverdin reductase B (flavin reductase (NADPH))           | major histocompatibility complex, class II, DO beta                      | dickkopf homolog 3 (Xenopus laevis)                                       |
| ATPase, Ca <sup>++</sup> transporting, plasma membrane 1                  | hyaluronoglucosaminidase 2                                     | bobby sox homolog (Drosophila)                              | matrix metalloproteinase 12 (macrophage elastase)                        | dihydrofolate reductase                                                   |
| ATPase, class VI, type 11B                                                | inositol(myo)-1(or 4)-monophosphatase 1                        | bone marrow stromal cell antigen 2                          | matrix metalloproteinase 13 (collagenase 3)                              | dysbindin (dystrobrevin binding protein 1) domain containing 2            |
| ATPase, Na <sup>+</sup> /K <sup>+</sup> transporting, alpha 1 polypeptide | insulin-like growth factor 2 receptor                          | brain expressed X-linked 2                                  | NEDD4 binding protein 2-like 2                                           | EH domain binding protein 1                                               |
| ATP-binding cassette, sub-family C (CFTR/MRP), member 3                   | Kruppel-like factor 5 (intestinal)                             | brain protein I3                                            | nidogen 2 (osteonidogen)                                                 | eukaryotic translation elongation factor 1 beta 2                         |
| bactericidal/permeability-increasing protein                              | leucine rich repeat (in FLII) interacting protein 2            | branched chain keto acid dehydrogenase E1, beta polypeptide | nitric oxide synthase 2, inducible                                       | eukaryotic translation elongation factor 1 gamma                          |
| BCL2-associated X protein                                                 | lipase A, lysosomal acid, cholesterol esterase                 | bromodomain containing 3                                    | nucleosome assembly protein 1-like 1                                     | eukaryotic translation initiation factor 2A, 65kDa                        |
| beaded filament structural protein 1, filensin                            | meningioma expressed antigen 5 (hyaluronidase)                 | calcium and integrin binding family member 2                | oviductal glycoprotein 1, 120kDa                                         | fasciculation and elongation protein zeta 1 (zygin I)                     |
| bradykinin receptor B1                                                    | mitogen-activated protein kinase kinase 3                      | calcium channel, voltage-dependent, beta 3 subunit          | patatin-like phospholipase domain containing 6                           | fibroblast activation protein, alpha                                      |
| breast carcinoma amplified sequence 1                                     | myeloid/lymphoid or mixed-lineage leukemia (trithorax homolog, | calcium/calmodulin-dependent protein kinase ID              | phosphoenolpyruvate carboxykinase 2 (mitochondrial)                      | guanine nucleotide binding protein (G protein), beta polypeptide 2-like 1 |

|                                     |                                                                                   |                                                            |                                                                                 |                                                             |
|-------------------------------------|-----------------------------------------------------------------------------------|------------------------------------------------------------|---------------------------------------------------------------------------------|-------------------------------------------------------------|
|                                     | Drosophila); translocated to, 3                                                   |                                                            |                                                                                 |                                                             |
| cadherin 16, KSP-cadherin           | myosin VB                                                                         | calsequestrin 2 (cardiac muscle)                           | phosphoglucomutase 1                                                            | guanosine monophosphate reductase                           |
| calcitonin-related polypeptide beta | NADH dehydrogenase (ubiquinone) Fe-S protein 1, 75kDa (NADH-coenzyme Q reductase) | calsyntenin 1                                              | pleckstrin homology domain containing, family G (with RhoGef domain) member 2   | heat shock 22kDa protein 8                                  |
| calpain 2, (m/II) large subunit     | neuropeptide Y receptor Y2                                                        | caprin family member 2                                     | proline-rich protein BstNI subfamily 3                                          | heat shock 70kDa protein 2                                  |
| calpain, small subunit 1            | orosomuroid 2                                                                     | carboxylesterase 1 (monocyte/macrophage serine esterase 1) | protein phosphatase 1, regulatory (inhibitor) subunit 12A                       | HtrA serine peptidase 1                                     |
| calpastatin                         | phosphatidylinositol-5-phosphate 4-kinase, type II, alpha                         | carnitine O-octanoyltransferase                            | RAP1, GTP-GDP dissociation stimulator 1                                         | hypothetical protein FLJ10357                               |
| canopy 3 homolog (zebrafish)        | phytanoyl-CoA 2-hydroxylase                                                       | casein kinase 2, alpha prime polypeptide                   | relaxin 2                                                                       | immunoglobulin lambda-like polypeptide 1                    |
| carbonic anhydrase XII              | polymeric immunoglobulin receptor                                                 | catalase                                                   | S100 calcium binding protein A6                                                 | insulin-like growth factor binding protein 2, 36kDa         |
| cartilage acidic protein 1          | programmed cell death 6 interacting protein                                       | catenin, beta interacting protein 1                        | sodium channel, nonvoltage-gated 1, beta                                        | insulin-like growth factor binding protein 6                |
| cathelicidin antimicrobial peptide  | protein kinase C, delta                                                           | CD81 molecule                                              | solute carrier family 13 (sodium-dependent dicarboxylate transporter), member 2 | insulin-like growth factor binding protein 7                |
| cathepsin E                         | protein kinase C, eta                                                             | CD82 molecule                                              | solute carrier family 2 (facilitated glucose transporter), member 1             | integrin, beta 3 (platelet glycoprotein IIIa, antigen CD61) |
| cathepsin L1                        | protein phosphatase 1, catalytic subunit, beta isoform                            | CDC-like kinase 1                                          | solute carrier family 22, member 23                                             | interleukin 11 receptor, alpha                              |
| cathepsin L2                        | protein phosphatase 1, regulatory (inhibitor) subunit 9B                          | centrosome and spindle pole associated protein 1           | sortilin-related receptor, L(DLR class) A repeats-containing                    | lactate dehydrogenase A                                     |
| CCR4-NOT transcription              | protein phosphatase 4,                                                            | chromosome 1 open                                          | sulfotransferase family 4A,                                                     | laminin, alpha 2                                            |

|                                                     |                                                                                                                                                          |                                      |                                                       |                                                                                        |
|-----------------------------------------------------|----------------------------------------------------------------------------------------------------------------------------------------------------------|--------------------------------------|-------------------------------------------------------|----------------------------------------------------------------------------------------|
| complex, subunit 8                                  | regulatory subunit 2                                                                                                                                     | reading frame 102                    | member 1                                              |                                                                                        |
| CD14 molecule                                       | quiescin Q6 sulfhydryl oxidase 1                                                                                                                         | chromosome 12 open reading frame 29  | sushi, nidogen and EGF-like domains 1                 | laminin, alpha 4                                                                       |
| CD1a molecule                                       | RAB11 family interacting protein 1 (class I)                                                                                                             | chromosome 16 open reading frame 13  | tetraspanin 15                                        | LIM domain binding 2                                                                   |
| CD2 (cytoplasmic tail) binding protein 2            | Ras-related GTP binding D                                                                                                                                | chromosome 17 open reading frame 63  | thymosin beta 15B                                     | lysyl oxidase-like 3                                                                   |
| CD40 molecule, TNF receptor superfamily member 5    | secreted phosphoprotein 1                                                                                                                                | chromosome 19 open reading frame 42  | transcription elongation factor A (SII), 2            | matrix Gla protein                                                                     |
| CD63 molecule                                       | secretogranin II (chromogranin C)                                                                                                                        | chromosome 20 open reading frame 108 | transforming, acidic coiled-coil containing protein 3 | matrix metalloproteinase 2 (gelatinase A, 72kDa gelatinase, 72kDa type IV collagenase) |
| cell division cycle 42 (GTP binding protein, 25kDa) | selenium binding protein 1                                                                                                                               | chromosome 20 open reading frame 152 | translocator protein (18kDa)                          | melanoma cell adhesion molecule                                                        |
| cellular retinoic acid binding protein 2            | serpin peptidase inhibitor, clade B (ovalbumin), member 11 (gene/pseudogene)                                                                             | chromosome 3 open reading frame 1    | transmembrane protein 41B                             | methyltransferase like 12                                                              |
| chaperonin containing TCP1, subunit 3 (gamma)       | sodium channel, nonvoltage-gated 1 alpha                                                                                                                 | chromosome 4 open reading frame 27   | troponin I type 2 (skeletal, fast)                    | myosin, heavy chain 11, smooth muscle                                                  |
| chaperonin containing TCP1, subunit 5 (epsilon)     | solute carrier family 12 (sodium/potassium/chloride transporters), member 2                                                                              | chromosome 5 open reading frame 4    | ubiquitin-conjugating enzyme E2C                      | NA                                                                                     |
| chaperonin containing TCP1, subunit 7 (eta)         | solute carrier family 17 (sodium phosphate), member 1                                                                                                    | chromosome 5 open reading frame 53   | v-fos FBJ murine osteosarcoma viral oncogene homolog  | nestin                                                                                 |
| chemokine (C-C motif) ligand 4-like 2               | solute carrier family 3 (cystine, dibasic and neutral amino acid transporters, activator of cystine, dibasic and neutral amino acid transport), member 1 | claudin 5                            | zinc finger CCCH-type containing 7A                   | peroxisome proliferator-activated receptor gamma                                       |
| chemokine (C-X-C motif)                             | ST3 beta-galactoside                                                                                                                                     | coiled-coil domain                   | zinc finger protein 295                               | phosphorylase kinase,                                                                  |

|                                                       |                                                                                                |                                                           |                                        |                                                          |
|-------------------------------------------------------|------------------------------------------------------------------------------------------------|-----------------------------------------------------------|----------------------------------------|----------------------------------------------------------|
| ligand 2                                              | alpha-2,3-sialyltransferase 4                                                                  | containing 91                                             |                                        | alpha 2 (liver)                                          |
| chemokine (C-X-C motif) ligand 5                      | T, brachyury homolog (mouse)                                                                   | cold shock domain protein A                               | zinc finger, FYVE domain containing 16 | platelet-derived growth factor receptor-like             |
| chimerin (chimaerin) 1                                | TAP binding protein (tapasin)                                                                  | collagen, type V, alpha 1                                 |                                        | pleckstrin homology domain containing, family O member 1 |
| chromatin modifying protein 6                         | TNFAIP3 interacting protein 1                                                                  | collagen, type VIII, alpha 1                              |                                        | podocalyxin-like                                         |
| chromosome 1 open reading frame 107                   | TraB domain containing                                                                         | complement component 8, gamma polypeptide                 |                                        | polymerase (RNA) I polypeptide D, 16kDa                  |
| chromosome 16 open reading frame 72                   | transmembrane protein 68                                                                       | cortactin binding protein 2                               |                                        | potassium channel, subfamily K, member 1                 |
| chromosome 4 open reading frame 31                    | two pore segment channel 1                                                                     | coxsackie virus and adenovirus receptor                   |                                        | PQ loop repeat containing 3                              |
| chromosome 6 open reading frame 153                   | UDP-GlcNAc:betaGal beta-1,3-N-acetylglucosaminyltransferase 2                                  | crystallin, alpha A                                       |                                        | procollagen C-endopeptidase enhancer                     |
| chromosome 6 open reading frame 66                    | UDP-N-acetyl-alpha-D-galactosamine:polypeptide N-acetylgalactosaminyltransferase 3 (GalNAc-T3) | crystallin, alpha B                                       |                                        | prostaglandin reductase 1                                |
| CNDP dipeptidase 2 (metallopeptidase M20 family)      | uroplakin 2                                                                                    | CSRP2 binding protein                                     |                                        | RAB34, member RAS oncogene family                        |
| coagulation factor II (thrombin)                      | von Hippel-Lindau tumor suppressor                                                             | C-type lectin domain family 11, member A                  |                                        | Rho GTPase activating protein 24                         |
| coatomer protein complex, subunit beta 2 (beta prime) | zonadhesin                                                                                     | cullin 9                                                  |                                        | ribosomal protein L22-like 1                             |
| coiled-coil domain containing 58                      |                                                                                                | cyclin I                                                  |                                        | ribosomal protein L23a                                   |
| collagen, type I, alpha 2                             |                                                                                                | cyclin-dependent kinase inhibitor 2D (p19, inhibits CDK4) |                                        | ribosomal protein L5                                     |

|                                                                              |  |                                                            |  |                                                                                             |
|------------------------------------------------------------------------------|--|------------------------------------------------------------|--|---------------------------------------------------------------------------------------------|
| collagen, type II, alpha 1                                                   |  | cystatin C                                                 |  | ribosomal protein S16                                                                       |
| complement component 1, q subcomponent, A chain                              |  | cysteine-rich protein 2                                    |  | ribosomal protein S26                                                                       |
| complement component 3                                                       |  | cytochrome b5 reductase 3                                  |  | ribosomal protein S3                                                                        |
| component of oligomeric golgi complex 6                                      |  | cytochrome c oxidase III                                   |  | ribosomal protein S5                                                                        |
| copine VI (neuronal)                                                         |  | cytochrome P450, family 27, subfamily A, polypeptide 1     |  | ribosomal protein S8                                                                        |
| coronin, actin binding protein, 1A                                           |  | cytochrome P450, family 4, subfamily B, polypeptide 1      |  | ribosomal protein, large, P0                                                                |
| creatine kinase, brain                                                       |  | D site of albumin promoter (albumin D-box) binding protein |  | sarcoglycan, gamma (35kDa dystrophin-associated glycoprotein)                               |
| creatine kinase, mitochondrial 1B                                            |  | dehydrogenase/reductase (SDR family) member 1              |  | secreted protein, acidic, cysteine-rich (osteonectin)                                       |
| crystallin, gamma S                                                          |  | dehydrogenase/reductase (SDR family) member 4              |  | secretoglobin, family 2A, member 2                                                          |
| cyclin D3                                                                    |  | DENN/MADD domain containing 2A                             |  | serine carboxypeptidase 1                                                                   |
| cyclin-dependent kinase inhibitor 1C (p57, Kip2)                             |  | diacylglycerol kinase, theta 110kDa                        |  | signal sequence receptor, delta (translocon-associated protein delta)                       |
| cysteine-rich with EGF-like domains 2                                        |  | dickkopf homolog 3 (Xenopus laevis)                        |  | similar to immunoglobulin iota chain preproprotein                                          |
| cytochrome b                                                                 |  | DiGeorge syndrome critical region gene 2                   |  | similar to Immunoglobulin omega chain precursor (VpreB2 protein)                            |
| cytochrome b-245, alpha polypeptide                                          |  | disrupted in renal carcinoma 2                             |  | solute carrier family 22 (extraneuronal monoamine transporter), member 3                    |
| DCN1, defective in cullin neddylation 1, domain containing 5 (S. cerevisiae) |  | DNL-type zinc finger                                       |  | solute carrier family 25 (mitochondrial carrier; adenine nucleotide translocator), member 4 |
| DEAD (Asp-Glu-Ala-Asp)                                                       |  | dopamine receptor D1                                       |  | solute carrier family 4,                                                                    |

|                                                                    |  |                                                                 |  |                                                                                 |
|--------------------------------------------------------------------|--|-----------------------------------------------------------------|--|---------------------------------------------------------------------------------|
| box polypeptide 27                                                 |  |                                                                 |  | anion exchanger, member 3                                                       |
| degenerative spermatocyte homolog 1, lipid desaturase (Drosophila) |  | dual specificity phosphatase 26 (putative)                      |  | solute carrier family 8 (sodium/calcium exchanger), member 1                    |
| Der1-like domain family, member 1                                  |  | dynein, cytoplasmic 2, heavy chain 1                            |  | splicing factor 3b, subunit 4, 49kDa                                            |
| DnaJ (Hsp40) homolog, subfamily B, member 1                        |  | ectonucleoside triphosphate diphosphohydrolase 2                |  | stathmin 1/oncoprotein 18                                                       |
| DnaJ (Hsp40) homolog, subfamily B, member 11                       |  | EH domain binding protein 1                                     |  | syntrophin, alpha 1 (dystrophin-associated protein A1, 59kDa, acidic component) |
| DnaJ (Hsp40) homolog, subfamily B, member 6                        |  | endothelin 2                                                    |  | tachykinin, precursor 1                                                         |
| DnaJ (Hsp40) homolog, subfamily B, member 9                        |  | epoxide hydrolase 1, microsomal (xenobiotic)                    |  | TEA domain family member 4                                                      |
| DnaJ (Hsp40) homolog, subfamily C, member 10                       |  | epoxide hydrolase 2, cytoplasmic                                |  | tetraspanin 4                                                                   |
| dolichyl-diphosphooligosaccharide-protein glycosyltransferase      |  | erythrocyte membrane protein band 4.1 like 4B                   |  | thrombospondin 2                                                                |
| Down syndrome critical region gene 3                               |  | family with sequence similarity 114, member A2                  |  | transforming growth factor, beta-induced, 68kDa                                 |
| dyskeratosis congenita 1, dyskerin                                 |  | family with sequence similarity 84, member A                    |  | transgelin                                                                      |
| early growth response 1                                            |  | F-box protein 9                                                 |  | transmembrane phosphoinositide 3-phosphatase and tensin homolog 2               |
| endonuclease G                                                     |  | fibroblast growth factor (acidic) intracellular binding protein |  | tropomyosin 2 (beta)                                                            |
| EPH receptor A2                                                    |  | fibroblast growth factor receptor 2                             |  | troponin T type 1 (skeletal, slow)                                              |

|                                                        |  |                                                         |  |                                                                 |
|--------------------------------------------------------|--|---------------------------------------------------------|--|-----------------------------------------------------------------|
| eukaryotic translation initiation factor 3, subunit B  |  | FK506 binding protein 1B, 12.6 kDa                      |  | tubulin, alpha 1a                                               |
| eukaryotic translation initiation factor 4E            |  | FK506 binding protein 4, 59kDa                          |  | tumor necrosis factor receptor superfamily, member 11b          |
| eukaryotic translation initiation factor 5B            |  | FK506 binding protein 9, 63 kDa                         |  | vascular cell adhesion molecule 1                               |
| exportin 6                                             |  | flavin containing monooxygenase 2 (non-functional)      |  | very low density lipoprotein receptor                           |
| Fas (TNF receptor superfamily, member 6)               |  | fms-related tyrosine kinase 4                           |  | vesicle amine transport protein 1 homolog (T. californica)-like |
| fatty acid desaturase 3                                |  | frizzled-related protein                                |  |                                                                 |
| fem-1 homolog b (C. elegans)                           |  | FXYD domain containing ion transport regulator 6        |  |                                                                 |
| ferritin, heavy polypeptide 1                          |  | glutaminyl-tRNA synthetase                              |  |                                                                 |
| ferritin, light polypeptide                            |  | glutathione S-transferase alpha 1                       |  |                                                                 |
| fibroblast growth factor 5                             |  | glyoxalase domain containing 4                          |  |                                                                 |
| fibronectin 1                                          |  | glyoxalase domain containing 5                          |  |                                                                 |
| filamin B, beta (actin binding protein 278)            |  | GNAS complex locus                                      |  |                                                                 |
| formyl peptide receptor 1                              |  | growth arrest-specific 6                                |  |                                                                 |
| fructosamine 3 kinase related protein                  |  | growth differentiation factor 1                         |  |                                                                 |
| fusion (involved in t(12;16) in malignant liposarcoma) |  | guanine nucleotide binding protein (G protein) alpha 12 |  |                                                                 |
| FXYD domain containing ion transport regulator 5       |  | heat shock 22kDa protein 8                              |  |                                                                 |
| FYVE, RhoGEF and PH domain containing 4                |  | heat shock 27kDa protein 1                              |  |                                                                 |



|                                                         |  |                                                  |  |  |
|---------------------------------------------------------|--|--------------------------------------------------|--|--|
| G patch domain containing 4                             |  | heat shock 70kDa protein 1A                      |  |  |
| G protein-coupled receptor 37 like 1                    |  | heat shock protein family B (small), member 11   |  |  |
| G1 to S phase transition 2                              |  | helicase-like transcription factor               |  |  |
| gap junction protein, alpha 10, 62kDa                   |  | hemochromatosis                                  |  |  |
| gastrokine 1                                            |  | hexosaminidase B (beta polypeptide)              |  |  |
| GLI pathogenesis-related 1                              |  | high mobility group nucleosomal binding domain 3 |  |  |
| glutathione peroxidase 1                                |  | hippocampus abundant transcript-like 1           |  |  |
| glutathione S-transferase mu 3 (brain)                  |  | histone cluster 1, H2bh                          |  |  |
| glutathione S-transferase pi 1                          |  | histone deacetylase 5                            |  |  |
| glyceraldehyde-3-phosphate dehydrogenase                |  | HSPB (heat shock 27kDa) associated protein 1     |  |  |
| glycerophosphodiester phosphodiesterase 1               |  | hyaluronoglucosaminidase 1                       |  |  |
| GM2 ganglioside activator                               |  | hydroxyacyl-Coenzyme A dehydrogenase             |  |  |
| growth associated protein 43                            |  | hydroxypyruvate isomerase homolog (E. coli)      |  |  |
| growth hormone receptor                                 |  | hydroxysteroid (17-beta) dehydrogenase 4         |  |  |
| GrpE-like 1, mitochondrial (E. coli)                    |  | hypothetical protein FLJ22184                    |  |  |
| guanine nucleotide binding protein (G protein), gamma 2 |  | hypothetical protein LOC389203                   |  |  |
| haptoglobin-related protein                             |  | immunoglobulin lambda-                           |  |  |

|                                                                                              |  |                                                                                  |  |  |
|----------------------------------------------------------------------------------------------|--|----------------------------------------------------------------------------------|--|--|
|                                                                                              |  | like polypeptide 1                                                               |  |  |
| heat shock 70kDa protein 5 (glucose-regulated protein, 78kDa)                                |  | immunoglobulin superfamily, member 10                                            |  |  |
| hemopexin                                                                                    |  | inhibitor of DNA binding 1, dominant negative helix-loop-helix protein           |  |  |
| heparin-binding EGF-like growth factor                                                       |  | inhibitor of DNA binding 3, dominant negative helix-loop-helix protein           |  |  |
| heterogeneous nuclear ribonucleoprotein D-like                                               |  | inhibitor of growth family, member 4                                             |  |  |
| HLA-B associated transcript 2                                                                |  | inositol 1,4,5-triphosphate receptor, type 3                                     |  |  |
| hypothetical protein LOC731467                                                               |  | insulin-like growth factor binding protein 2, 36kDa                              |  |  |
| hypoxia inducible factor 1, alpha subunit (basic helix-loop-helix transcription factor)      |  | insulin-like growth factor binding protein 5                                     |  |  |
| immunoglobulin superfamily, member 8                                                         |  | integrin alpha FG-GAP repeat containing 1                                        |  |  |
| integrin alpha FG-GAP repeat containing 3                                                    |  | integrin, alpha 2b (platelet glycoprotein IIb of IIb/IIIa complex, antigen CD41) |  |  |
| integrin, alpha 3 (antigen CD49C, alpha 3 subunit of VLA-3 receptor)                         |  | integrin, beta 5                                                                 |  |  |
| integrin, beta 1 (fibronectin receptor, beta polypeptide, antigen CD29 includes MDF2, MSK12) |  | interleukin 18 (interferon-gamma-inducing factor)                                |  |  |
| integrin, beta 3 (platelet glycoprotein IIIa, antigen CD61)                                  |  | jagged 2                                                                         |  |  |
| interleukin 1 receptor                                                                       |  | junctional protein 2                                                             |  |  |

|                                                                                          |  |                                                |  |  |
|------------------------------------------------------------------------------------------|--|------------------------------------------------|--|--|
| antagonist                                                                               |  |                                                |  |  |
| interleukin 1, alpha                                                                     |  | kelch domain containing 3                      |  |  |
| interleukin 1, beta                                                                      |  | kelch repeat and BTB (POZ) domain containing 3 |  |  |
| interleukin 8                                                                            |  | KIAA0649                                       |  |  |
| interleukin 8 receptor, alpha                                                            |  | KIAA1009                                       |  |  |
| IQ motif containing GTPase activating protein 2                                          |  | KIAA1614                                       |  |  |
| isopentenyl-diphosphate delta isomerase 1                                                |  | kinesin family member 16B                      |  |  |
| keratin 6A                                                                               |  | Kv channel interacting protein 4               |  |  |
| kinesin family member 19                                                                 |  | lactamase, beta 2                              |  |  |
| kinesin family member 5C                                                                 |  | LAG1 homolog, ceramide synthase 4              |  |  |
| kinesin light chain 1                                                                    |  | laminin, beta 2 (laminin S)                    |  |  |
| lactalbumin, alpha-                                                                      |  | LEM domain containing 2                        |  |  |
| leukocyte immunoglobulin-like receptor, subfamily A (with TM domain), member 4           |  | leucine rich repeat containing 49              |  |  |
| leukocyte immunoglobulin-like receptor, subfamily B (with TM and ITIM domains), member 3 |  | leucine zipper, putative tumor suppressor 2    |  |  |
| lipoma HMGIC fusion partner                                                              |  | ligand of numb-protein X 1                     |  |  |
| lipopolysaccharide-induced TNF factor                                                    |  | like-glycosyltransferase                       |  |  |
| low density lipoprotein receptor                                                         |  | LIM domain binding 1                           |  |  |
| lymphocyte antigen 96                                                                    |  | LY6/PLAUR domain containing 2                  |  |  |
| lysozyme (renal                                                                          |  | lymphocyte antigen 6                           |  |  |

|                                                                                        |  |                                                                                        |  |  |
|----------------------------------------------------------------------------------------|--|----------------------------------------------------------------------------------------|--|--|
| amyloidosis)                                                                           |  | complex, locus E                                                                       |  |  |
| major histocompatibility complex, class I, B                                           |  | LYR motif containing 5                                                                 |  |  |
| major histocompatibility complex, class II, DQ alpha 1                                 |  | lysyl oxidase-like 1                                                                   |  |  |
| major vault protein                                                                    |  | MACRO domain containing 1                                                              |  |  |
| MAP kinase interacting serine/threonine kinase 1                                       |  | MAF1 homolog (S. cerevisiae)                                                           |  |  |
| MARCKS-like 1                                                                          |  | mannosidase, alpha, class 2A, member 2                                                 |  |  |
| matrix metalloproteinase 1 (interstitial collagenase)                                  |  | MAP7 domain containing 2                                                               |  |  |
| matrix metalloproteinase 3 (stromelysin 1, progelatinase)                              |  | matrilin 2                                                                             |  |  |
| matrix metalloproteinase 9 (gelatinase B, 92kDa gelatinase, 92kDa type IV collagenase) |  | matrix metalloproteinase 2 (gelatinase A, 72kDa gelatinase, 72kDa type IV collagenase) |  |  |
| MAX dimerization protein 1                                                             |  | McKusick-Kaufman syndrome                                                              |  |  |
| Mdm2 p53 binding protein homolog (mouse)                                               |  | melanoma antigen family D, 2                                                           |  |  |
| metallothionein 2A                                                                     |  | metallothionein 3                                                                      |  |  |
| mevalonate (diphospho) decarboxylase                                                   |  | methylmalonyl Coenzyme A mutase                                                        |  |  |
| microtubule associated monooxygenase, calponin and LIM domain containing 1             |  | mitochondrial carrier homolog 1 (C. elegans)                                           |  |  |
| mitochondrial ribosomal protein L33                                                    |  | mitochondrial tumor suppressor 1                                                       |  |  |
| mitochondrial ribosomal protein S31                                                    |  | MORC family CW-type zinc finger 2                                                      |  |  |

|                                                               |  |                                                                        |  |  |
|---------------------------------------------------------------|--|------------------------------------------------------------------------|--|--|
| mitogen-activated protein kinase 14                           |  | MYC binding protein 2                                                  |  |  |
| myosin binding protein C, fast type                           |  | myosin IXA                                                             |  |  |
| NA                                                            |  | myosin, heavy chain 3, skeletal muscle, embryonic                      |  |  |
| Na <sup>+</sup> /H <sup>+</sup> exchanger domain containing 2 |  | myosin, heavy chain 6, cardiac muscle, alpha                           |  |  |
| NAD(P)H dehydrogenase, quinone 2                              |  | NA                                                                     |  |  |
| NADH dehydrogenase (ubiquinone) 1 alpha subcomplex, 4, 9kDa   |  | NA                                                                     |  |  |
| NADH dehydrogenase, subunit 2 (complex I)                     |  | N-acetylglucosamine kinase                                             |  |  |
| NCK-associated protein 1-like                                 |  | N-acetyltransferase 6 (GCN5-related)                                   |  |  |
| neuregulin 1                                                  |  | NADH dehydrogenase (ubiquinone) 1 alpha subcomplex, 4-like 2           |  |  |
| neuroblastoma RAS viral (v-ras) oncogene homolog              |  | nascent polypeptide-associated complex alpha subunit                   |  |  |
| neutrophil cytosolic factor 1                                 |  | nephronophthisis 4                                                     |  |  |
| neutrophil cytosolic factor 2                                 |  | neural precursor cell expressed, developmentally down-regulated 4-like |  |  |
| neutrophil cytosolic factor 4, 40kDa                          |  | neural proliferation, differentiation and control, 1                   |  |  |
| NOP14 nucleolar protein homolog (yeast)                       |  | nicolin 1                                                              |  |  |
| NOP2 nucleolar protein homolog (yeast)                        |  | N-terminal asparagine amidase                                          |  |  |

|                                                        |  |                                                                     |  |  |
|--------------------------------------------------------|--|---------------------------------------------------------------------|--|--|
| NOP58 ribonucleoprotein homolog (yeast)                |  | nuclear mitotic apparatus protein 1                                 |  |  |
| Notch homolog 2 (Drosophila)                           |  | nuclear receptor coactivator 7                                      |  |  |
| nuclear import 7 homolog (S. cerevisiae)               |  | nuclear receptor subfamily 2, group F, member 1                     |  |  |
| nucleolar complex associated 2 homolog (S. cerevisiae) |  | obscurin-like 1                                                     |  |  |
| nucleolar protein 12                                   |  | olfactomedin 1                                                      |  |  |
| nucleoredoxin                                          |  | paraoxonase 3                                                       |  |  |
| nucleotide-binding oligomerization domain containing 1 |  | PDZ and LIM domain 4                                                |  |  |
| ornithine decarboxylase 1                              |  | PDZ domain containing 1                                             |  |  |
| osteoclast associated, immunoglobulin-like receptor    |  | period homolog 1 (Drosophila)                                       |  |  |
| oxysterol binding protein-like 6                       |  | peroxiredoxin 2                                                     |  |  |
| PAK1 interacting protein 1                             |  | peroxisomal biogenesis factor 11 alpha                              |  |  |
| parathyroid hormone-like hormone                       |  | peroxisomal biogenesis factor 3                                     |  |  |
| parvin, beta                                           |  | phosphatidic acid phosphatase type 2B                               |  |  |
| paxillin                                               |  | phosphatidylinositol transfer protein, membrane-associated 1        |  |  |
| peptidylprolyl isomerase (cyclophilin)-like 4          |  | phosphoglucomutase 2-like 1                                         |  |  |
| peroxisome proliferator-activated receptor delta       |  | phosphoserine aminotransferase 1                                    |  |  |
| phosphogluconate dehydrogenase                         |  | pleckstrin homology domain containing, family B (evectins) member 1 |  |  |

|                                                              |  |                                                                                       |  |  |
|--------------------------------------------------------------|--|---------------------------------------------------------------------------------------|--|--|
| phosphoglycerate kinase 1                                    |  | pleckstrin homology domain containing, family G (with RhoGef domain) member 3         |  |  |
| phosphoglycerate mutase 2 (muscle)                           |  | plexin domain containing 2                                                            |  |  |
| phosphoglycolate phosphatase                                 |  | poly(A) binding protein interacting protein 2                                         |  |  |
| pituitary tumor-transforming 1 interacting protein           |  | polymerase (RNA) III (DNA directed) polypeptide G (32kD)-like                         |  |  |
| plasminogen activator, tissue                                |  | polymerase (RNA) III (DNA directed) polypeptide K, 12.3 kDa                           |  |  |
| platelet factor 4                                            |  | potassium large conductance calcium-activated channel, subfamily M, beta member 1     |  |  |
| platelet-activating factor receptor                          |  | pre-B-cell leukemia homeobox interacting protein 1                                    |  |  |
| plexin A2                                                    |  | premature ovarian failure, 1B                                                         |  |  |
| potassium inwardly-rectifying channel, subfamily J, member 3 |  | prion protein                                                                         |  |  |
| pre-B lymphocyte 1                                           |  | proline-rich protein BstNI subfamily 1                                                |  |  |
| programmed cell death 6 interacting protein                  |  | proline-rich protein BstNI subfamily 2                                                |  |  |
| proline-serine-threonine phosphatase interacting protein 1   |  | prostaglandin-endoperoxide synthase 1 (prostaglandin G/H synthase and cyclooxygenase) |  |  |

|                                                                                            |  |                                                                   |  |  |
|--------------------------------------------------------------------------------------------|--|-------------------------------------------------------------------|--|--|
| prostaglandin-endoperoxide synthase 2 (prostaglandin G/H synthase and cyclooxygenase)      |  | protease, serine, 23                                              |  |  |
| proteasome (prosome, macropain) 26S subunit, non-ATPase, 14                                |  | protein phosphatase 2 (formerly 2A), regulatory subunit B", gamma |  |  |
| protein disulfide isomerase family A, member 4                                             |  | protein S (alpha)                                                 |  |  |
| protein disulfide isomerase family A, member 6                                             |  | PTEN induced putative kinase 1                                    |  |  |
| protein kinase, cAMP-dependent, regulatory, type I, alpha (tissue specific extinguisher 1) |  | purinergic receptor P2X, ligand-gated ion channel, 4              |  |  |
| protein tyrosine phosphatase, non-receptor type 11                                         |  | putative homeodomain transcription factor 1                       |  |  |
| protocadherin gamma subfamily A, 2                                                         |  | RALBP1 associated Eps domain containing 1                         |  |  |
| purinergic receptor P2Y, G-protein coupled, 2                                              |  | RAS-like, family 11, member A                                     |  |  |
| putative homeodomain transcription factor 2                                                |  | regucalcin (senescence marker protein-30)                         |  |  |
| RAB11A, member RAS oncogene family                                                         |  | reticulocalbin 2, EF-hand calcium binding domain                  |  |  |
| RAD51 homolog (RecA homolog, E. coli) (S. cerevisiae)                                      |  | retinal outer segment membrane protein 1                          |  |  |
| RAN binding protein 3                                                                      |  | Rh family, B glycoprotein (gene/pseudogene)                       |  |  |
| ras homolog gene family, member C                                                          |  | RhoA/RAC/CDC42 exchange factor                                    |  |  |
| RCD1 required for cell differentiation1 homolog                                            |  | ribonuclease, RNase A family, 4                                   |  |  |



|                                                       |  |                                                                        |  |  |
|-------------------------------------------------------|--|------------------------------------------------------------------------|--|--|
| (S. pombe)                                            |  |                                                                        |  |  |
| regulatory solute carrier protein, family 1, member 1 |  | ribosomal protein L28                                                  |  |  |
| replication initiator 1                               |  | ribosomal protein L35                                                  |  |  |
| Rho family GTPase 3                                   |  | ribosomal protein L5                                                   |  |  |
| ribosomal protein S19 binding protein 1               |  | ribosomal protein S18                                                  |  |  |
| ribosomal protein S6 kinase, 90kDa, polypeptide 1     |  | ring finger protein 7                                                  |  |  |
| ring finger protein 41                                |  | rogdi homolog (Drosophila)                                             |  |  |
| RuvB-like 1 (E. coli)                                 |  | RUN and SH3 domain containing 2                                        |  |  |
| S100 calcium binding protein A10                      |  | scavenger receptor class B, member 1                                   |  |  |
| S100 calcium binding protein A11                      |  | sclerostin domain containing 1                                         |  |  |
| S100 calcium binding protein A12                      |  | secretoglobin, family 1D, member 2                                     |  |  |
| S100 calcium binding protein A6                       |  | selenium binding protein 1                                             |  |  |
| S100 calcium binding protein A8                       |  | selenoprotein P, plasma, 1                                             |  |  |
| S100 calcium binding protein A9                       |  | serine incorporator 3                                                  |  |  |
| schwannomin interacting protein 1                     |  | serine peptidase inhibitor-like, with Kunitz and WAP domains 1 (eppin) |  |  |
| Sec23 homolog B (S. cerevisiae)                       |  | serpin peptidase inhibitor, clade I (neuroserpin), member 1            |  |  |
| secretory leukocyte peptidase inhibitor               |  | short coiled-coil protein                                              |  |  |
| selenoprotein T                                       |  | signal transducer and activator of transcription 1,                    |  |  |

|                                                                                                        |  |                                                                                                |  |  |
|--------------------------------------------------------------------------------------------------------|--|------------------------------------------------------------------------------------------------|--|--|
|                                                                                                        |  | 91kDa                                                                                          |  |  |
| selenoprotein X, 1                                                                                     |  | silver homolog (mouse)                                                                         |  |  |
| serglycin                                                                                              |  | similar to immunoglobulin<br>iota chain preproprotein                                          |  |  |
| serine incorporator 2                                                                                  |  | similar to Immunoglobulin<br>omega chain precursor<br>(VpreB2 protein)                         |  |  |
| serine<br>palmitoyltransferase, long<br>chain base subunit 2                                           |  | sirtuin (silent mating type<br>information regulation 2<br>homolog) 2 ( <i>S. cerevisiae</i> ) |  |  |
| serine/threonine kinase<br>17a                                                                         |  | SLIT and NTRK-like family,<br>member 6                                                         |  |  |
| serpin peptidase inhibitor,<br>clade B (ovalbumin),<br>member 2                                        |  | SLIT-ROBO Rho GTPase<br>activating protein 2                                                   |  |  |
| serpin peptidase inhibitor,<br>clade B (ovalbumin),<br>member 6                                        |  | small nuclear<br>ribonucleoprotein<br>polypeptide N                                            |  |  |
| serpin peptidase inhibitor,<br>clade E (nexin,<br>plasminogen activator<br>inhibitor type 1), member 2 |  | SNAP-associated protein                                                                        |  |  |
| serum amyloid A1                                                                                       |  | solute carrier family 15,<br>member 4                                                          |  |  |
| serum/glucocorticoid<br>regulated kinase 1                                                             |  | solute carrier family 19,<br>member 3                                                          |  |  |
| signal peptide peptidase 3                                                                             |  | solute carrier family 22<br>(organic anion transporter),<br>member 7                           |  |  |
| signal sequence receptor,<br>alpha                                                                     |  | solute carrier family 23<br>(nucleobase transporters),<br>member 2                             |  |  |
| signal-regulatory protein<br>alpha                                                                     |  | solute carrier family 24,<br>member 5                                                          |  |  |
| similar to immunoglobulin<br>iota chain preproprotein                                                  |  | solute carrier family 25<br>(carnitine/acylcarnitine                                           |  |  |

|                                                                                            |  |                                                                                             |  |  |
|--------------------------------------------------------------------------------------------|--|---------------------------------------------------------------------------------------------|--|--|
|                                                                                            |  | translocase), member 20                                                                     |  |  |
| similar to Immunoglobulin omega chain precursor (VpreB2 protein)                           |  | solute carrier family 25 (mitochondrial carrier; adenine nucleotide translocator), member 4 |  |  |
| similar to phosphoglycerate mutase processed protein                                       |  | solute carrier family 25, member 37                                                         |  |  |
| Sjogren syndrome antigen B (autoantigen La)                                                |  | solute carrier family 37 (glycerol-3-phosphate transporter), member 2                       |  |  |
| small nuclear ribonucleoprotein 25kDa (U11/U12)                                            |  | solute carrier family 39 (zinc transporter), member 10                                      |  |  |
| small nuclear ribonucleoprotein polypeptide A'                                             |  | solute carrier family 4, sodium bicarbonate cotransporter, member 4                         |  |  |
| small optic lobes homolog (Drosophila)                                                     |  | solute carrier family 46 (folate transporter), member 1                                     |  |  |
| sodium channel, nonvoltage-gated 1, beta                                                   |  | solute carrier family 5 (sodium/glucose cotransporter), member 10                           |  |  |
| sodium channel, voltage-gated, type I, beta                                                |  | sorting nexin 1                                                                             |  |  |
| solute carrier family 2 (facilitated glucose transporter), member 3                        |  | SPARC-like 1 (hevin)                                                                        |  |  |
| solute carrier family 29 (nucleoside transporters), member 2                               |  | spastic paraplegia 7 (pure and complicated autosomal recessive)                             |  |  |
| solute carrier family 3 (activators of dibasic and neutral amino acid transport), member 2 |  | sperm specific antigen 2                                                                    |  |  |
| solute carrier family 7                                                                    |  | staufen, RNA binding                                                                        |  |  |

|                                                                                |  |                                                |  |  |
|--------------------------------------------------------------------------------|--|------------------------------------------------|--|--|
| (cationic amino acid transporter, y+ system), member 5                         |  | protein, homolog 2 (Drosophila)                |  |  |
| solute carrier family 7 (cationic amino acid transporter, y+ system), member 7 |  | sterile alpha motif domain containing 1        |  |  |
| solute carrier family 9 (sodium/hydrogen exchanger), member 3 regulator 1      |  | sterile alpha motif domain containing 11       |  |  |
| sorcin                                                                         |  | sterol carrier protein 2                       |  |  |
| splicing factor, arginine/serine-rich 18                                       |  | storkhead box 2                                |  |  |
| splicing factor, arginine/serine-rich 7, 35kDa                                 |  | stromal interaction molecule 2                 |  |  |
| stearoyl-CoA desaturase (delta-9-desaturase)                                   |  | synuclein, beta                                |  |  |
| sterol regulatory element binding transcription factor 1                       |  | TEA domain family member 2                     |  |  |
| sterol-C4-methyl oxidase-like                                                  |  | tetratricopeptide repeat domain 38             |  |  |
| sulfiredoxin 1 homolog (S. cerevisiae)                                         |  | thioredoxin interacting protein                |  |  |
| sulfotransferase family 4A, member 1                                           |  | threonyl-tRNA synthetase-like 2                |  |  |
| surfeit 4                                                                      |  | thrombospondin 1                               |  |  |
| syndecan 4                                                                     |  | thymocyte nuclear protein 1                    |  |  |
| syndecan binding protein (syntenin)                                            |  | transcription elongation factor A (SII), 3     |  |  |
| TBC1 (tre-2/USP6, BUB2, cdc16) domain family, member 1                         |  | transcription elongation factor A (SII)-like 1 |  |  |

|                                                                  |  |                                                                    |  |  |
|------------------------------------------------------------------|--|--------------------------------------------------------------------|--|--|
| thioredoxin                                                      |  | transient receptor potential cation channel, subfamily V, member 5 |  |  |
| thioredoxin-like 4A                                              |  | transmembrane 7 superfamily member 2                               |  |  |
| thioredoxin-related transmembrane protein 1                      |  | transmembrane protein 42                                           |  |  |
| thrombospondin 1                                                 |  | transmembrane protein 59                                           |  |  |
| thrombospondin, type I, domain containing 1                      |  | tripartite motif-containing 47                                     |  |  |
| THUMP domain containing 3                                        |  | tropomyosin 1 (alpha)                                              |  |  |
| thymosin beta 4, X-linked                                        |  | TSC22 domain family, member 3                                      |  |  |
| TIMP metalloproteinase inhibitor 1                               |  | tubby like protein 2                                               |  |  |
| TIMP metalloproteinase inhibitor 2                               |  | tubulin polymerization-promoting protein family member 3           |  |  |
| toll-like receptor 2                                             |  | tubulin, alpha 1a                                                  |  |  |
| toll-like receptor 4                                             |  | tumor protein D52-like 1                                           |  |  |
| transformer 2 beta homolog (Drosophila)                          |  | tumor protein p53 binding protein 1                                |  |  |
| transforming growth factor, beta 1                               |  | tweety homolog 1 (Drosophila)                                      |  |  |
| transforming growth factor, beta receptor II (70/80kDa)          |  | tyrosinase (oculocutaneous albinism IA)                            |  |  |
| transgelin 2                                                     |  | tyrosinase-related protein 1                                       |  |  |
| transgelin 3                                                     |  | tyrosylprotein sulfotransferase 1                                  |  |  |
| translocase of inner mitochondrial membrane 17 homolog A (yeast) |  | ubiquitin carboxyl-terminal esterase L1 (ubiquitin thiolesterase)  |  |  |
| translocase of outer                                             |  | UBX domain protein 6                                               |  |  |

|                                                                 |  |                                                               |  |  |
|-----------------------------------------------------------------|--|---------------------------------------------------------------|--|--|
| mitochondrial membrane 40 homolog (yeast)                       |  |                                                               |  |  |
| transmembrane protein 140                                       |  | UDP-GlcNAc:betaGal beta-1,3-N-acetylglucosaminyltransferase 1 |  |  |
| transmembrane protein 170B                                      |  | UDP-glucose pyrophosphorylase 2                               |  |  |
| transmembrane protein 2                                         |  | unc-119 homolog (C. elegans)                                  |  |  |
| transmembrane protein 33                                        |  | unconventional SNARE in the ER 1 homolog (S. cerevisiae)      |  |  |
| transmembrane protein 8 (five membrane-spanning domains)        |  | vacuolar protein sorting 13 homolog A (S. cerevisiae)         |  |  |
| tubulin, beta 6                                                 |  | vacuolar protein sorting 33 homolog B (yeast)                 |  |  |
| tumor necrosis factor (TNF superfamily, member 2)               |  | viral DNA polymerase-transactivated protein 6                 |  |  |
| tumor necrosis factor, alpha-induced protein 6                  |  | vitronectin                                                   |  |  |
| ubiquitin carboxyl-terminal hydrolase L5                        |  | voltage-dependent anion channel 1                             |  |  |
| ubiquitin specific peptidase 14 (tRNA-guanine transglycosylase) |  | WD repeat domain 45                                           |  |  |
| ubiquitin-fold modifier 1                                       |  | Williams Beuren syndrome chromosome region 27                 |  |  |
| UDP-galactose-4-epimerase                                       |  | Wilms tumor 1 interacting protein                             |  |  |
| UDP-GlcNAc:betaGal beta-1,3-N-acetylglucosaminyltransferase 8   |  | WW domain binding protein 1                                   |  |  |
| UDP-glucose                                                     |  | zinc finger CCCH-type                                         |  |  |

|                                                                                   |  |                                        |  |  |
|-----------------------------------------------------------------------------------|--|----------------------------------------|--|--|
| dehydrogenase                                                                     |  | containing 6                           |  |  |
| UHRF1 binding protein 1-like                                                      |  | zinc finger protein 260                |  |  |
| uncoupling protein 2 (mitochondrial, proton carrier)                              |  | zinc finger protein 358                |  |  |
| UTP14, U3 small nucleolar ribonucleoprotein, homolog A (yeast)                    |  | zinc finger protein 532                |  |  |
| uveal autoantigen with coiled-coil domains and ankyrin repeats                    |  | zinc finger protein 64 homolog (mouse) |  |  |
| valosin-containing protein                                                        |  | zinc finger protein 706                |  |  |
| vanin 1                                                                           |  | zinc finger, MYM-type 5                |  |  |
| vascular endothelial growth factor A                                              |  |                                        |  |  |
| v-ets erythroblastosis virus E26 oncogene homolog 1 (avian)                       |  |                                        |  |  |
| vinculin                                                                          |  |                                        |  |  |
| v-ral simian leukemia viral oncogene homolog B (ras related; GTP binding protein) |  |                                        |  |  |
| WD repeat domain 1                                                                |  |                                        |  |  |
| WD repeat domain 12                                                               |  |                                        |  |  |
| WD repeat domain 60                                                               |  |                                        |  |  |
| WD repeat domain 77                                                               |  |                                        |  |  |
| wingless-type MMTV integration site family, member 7A                             |  |                                        |  |  |
| WW and C2 domain containing 2                                                     |  |                                        |  |  |
| Yip1 interacting factor homolog B (S. cerevisiae)                                 |  |                                        |  |  |
| zinc finger protein 642                                                           |  |                                        |  |  |

|                                         |  |  |  |  |
|-----------------------------------------|--|--|--|--|
| zinc finger, MYND-type<br>containing 19 |  |  |  |  |
|-----------------------------------------|--|--|--|--|
